# Supplementary material
Source: PubMed Central journal article supplement (PMC6622420)
Supplement: ASN.2018101064SupplementaryData.pdf [file ASN.2018101064SupplementaryData.pdf]

## **SUPPLEMENTAL MATERIAL**

### **Human tissue-resident mucosal-associated invariant T (MAIT) cells in renal fibrosis and chronic kidney disease (CKD)**

**Authors:** Becker M.P. Law, BSc(Hons)<sup>1,2,3</sup>, Ray Wilkinson, PhD<sup>1,2,3,4</sup>, Xiangju Wang, MPhil<sup>1,2</sup>, Katrina Kildey, PhD<sup>1,2</sup>, Kurt Giuliani, BSc(Hons)<sup>1,2,4</sup>, Kenneth W. Beagley, PhD<sup>3</sup>, Jacobus Ungerer, MD<sup>1</sup>, Helen Healy, MD PhD<sup>1,2,4,\*</sup>, Andrew J. Kassianos, PhD<sup>1,2,3,4,\*</sup>.

**Affiliations:** <sup>1</sup>Conjoint Kidney Research Laboratory, Chemical Pathology, Pathology Queensland, Brisbane, Queensland, Australia; <sup>2</sup>Kidney Health Service, Royal Brisbane and Women's Hospital, Brisbane, Queensland, Australia; <sup>3</sup>Institute of Health and Biomedical Innovation/School of Biomedical Sciences, Queensland University of Technology, Brisbane, Queensland, Australia and <sup>4</sup>Medical School, University of Queensland, Brisbane, Queensland, Australia.

\*These authors contributed equally.

## **SUPPLEMENTAL MATERIAL – TABLE OF CONTENTS**

**Supplementary Table 1.** Clinical and histological features of patients at the time of kidney biopsy.

**Supplementary Table 2.** Antibodies used for flow cytometric staining.

**Supplementary Figure 1. MAIT cell numbers and phenotype do not significantly correlate with primary diagnoses of patients.** Absolute numbers of MAIT cells (**A**), and MAIT cell expression of CD103 (**B**) and CD69 (**C**) in healthy kidney tissue and diseased biopsies with glomerular immune-mediated (GI), glomerular non-immune-mediated (GNI) and non-glomerular (NG) primary diagnoses. Values for individual donors are presented; horizontal bars represent medians, with interquartile range also presented.

**Supplementary Table 1.** Clinical and histological features of patients at the time of kidney biopsy.

| <b>Patient</b>                                       | <b>Age (Years)/<br/>Sex (M/F)</b> | <b>Primary<br/>Disease</b>         | <b>eGFR<br/>(ml/min/1.73m<sup>2</sup>)</b> | <b>Tubulointerstitial<br/>Fibrosis (%)</b> |
|------------------------------------------------------|-----------------------------------|------------------------------------|--------------------------------------------|--------------------------------------------|
| <i>Glomerular immune-mediated disease (n=18)</i>     |                                   |                                    |                                            |                                            |
| 1                                                    | 52/M                              | Crescentic GN                      | 48                                         | 10                                         |
| 2                                                    | 70/M                              | Membranous nephropathy             | 87                                         | 0                                          |
| 3                                                    | 34/M                              | Minimal change disease             | 90                                         | 0                                          |
| 4                                                    | 22/F                              | Lupus nephritis                    | 90                                         | 3                                          |
| 5                                                    | 28/F                              | Pauci-immune GN                    | 12                                         | 70                                         |
| 6                                                    | 34/M                              | IgA nephropathy                    | 37                                         | 15                                         |
| 7                                                    | 79/M                              | Pauci-immune GN                    | 24                                         | 30                                         |
| 8                                                    | 77/M                              | IgA nephropathy                    | 14                                         | 5                                          |
| 9                                                    | 28/M                              | IgA nephropathy                    | 90                                         | 3                                          |
| 10                                                   | 23/F                              | Membranoproliferative GN           | 90                                         | 0                                          |
| 11                                                   | 82/M                              | Membranous nephropathy             | 68                                         | 3                                          |
| 12                                                   | 27/M                              | IgA nephropathy                    | 26                                         | 30                                         |
| 13                                                   | 30/M                              | IgA nephropathy                    | 65                                         | 0                                          |
| 14                                                   | 30/M                              | Minimal change disease             | 90                                         | 0                                          |
| 15                                                   | 43/M                              | IgA nephropathy                    | 59                                         | 0                                          |
| 16                                                   | 59/M                              | Membranous nephropathy             | 74                                         | 5                                          |
| 17                                                   | 39/M                              | IgA nephropathy                    | 90                                         | 0                                          |
| 18                                                   | 51/F                              | Membranous nephropathy             | 39                                         | 5                                          |
| <i>Glomerular non-immune-mediated disease (n=20)</i> |                                   |                                    |                                            |                                            |
| 1                                                    | 60/F                              | Diabetic nephropathy               | 63                                         | 10                                         |
| 2                                                    | 53/M                              | Focal segmental glomerulosclerosis | 27                                         | 30                                         |
| 3                                                    | 38/F                              | Focal segmental glomerulosclerosis | 68                                         | 20                                         |
| 4                                                    | 54/F                              | Fibrillary GN                      | 46                                         | 10                                         |
| 5                                                    | 55/M                              | Diabetic nephropathy               | 20                                         | 20                                         |
| 6                                                    | 29/F                              | Focal segmental glomerulosclerosis | 35                                         | 40                                         |
| 7                                                    | 58/M                              | Diabetic nephropathy               | 37                                         | 25                                         |

|                                     |      |                                    |    |    |
|-------------------------------------|------|------------------------------------|----|----|
| 8                                   | 66/F | Focal segmental glomerulosclerosis | 90 | 5  |
| 9                                   | 70/F | Focal segmental glomerulosclerosis | 28 | 30 |
| 10                                  | 33/M | Diabetic nephropathy               | 36 | 5  |
| 11                                  | 75/M | Renal amyloidosis                  | 24 | 5  |
| 12                                  | 36/M | Focal segmental glomerulosclerosis | 44 | 0  |
| 13                                  | 53/M | Diabetic nephropathy               | 26 | 50 |
| 14                                  | 37/F | Focal segmental glomerulosclerosis | 90 | 3  |
| 15                                  | 59/M | Focal segmental glomerulosclerosis | 16 | 5  |
| 16                                  | 63/M | Diabetic nephropathy               | 89 | 10 |
| 17                                  | 53/F | Diabetic nephropathy               | 10 | 50 |
| 18                                  | 45/F | Renal amyloidosis                  | 90 | 3  |
| 19                                  | 24/M | Focal segmental glomerulosclerosis | 73 | 5  |
| 20                                  | 40/F | Focal segmental glomerulosclerosis | 66 | 0  |
| <i>Non-glomerular disease (n=9)</i> |      |                                    |    |    |
| 1                                   | 66/F | Hypertensive nephropathy           | 30 | 25 |
| 2                                   | 57/F | Arterionephrosclerosis             | 24 | 10 |
| 3                                   | 61/M | Interstitial nephritis             | 43 | 0  |
| 4                                   | 58/M | Interstitial nephritis             | 10 | 0  |
| 5                                   | 59/M | Hypertensive nephropathy           | 49 | 10 |
| 6                                   | 58/M | Interstitial nephritis             | 19 | 0  |
| 7                                   | 80/F | Arterionephrosclerosis             | 5  | 20 |
| 8                                   | 34/M | Interstitial nephritis             | 22 | 5  |
| 9                                   | 53/F | Interstitial nephritis             | 38 | 20 |

---

**Supplementary Table 2.** Antibodies used for flow cytometric staining.

| Antigen                  | Clone    | Fluorochrome         | Source    |
|--------------------------|----------|----------------------|-----------|
| CD45                     | HI30     | Brilliant Violet 510 | Biolegend |
| CD3                      | OKT3     | Brilliant Violet 650 | Biolegend |
| TCR V $\alpha$ 7.2       | 3C10     | Brilliant Violet 605 | Biolegend |
| CD161                    | HP-3G10  | Brilliant Violet 785 | Biolegend |
| CD8                      | RPA-T8   | PerCP-Cy5.5          | Biolegend |
| IL-18R $\alpha$ (CD218a) | H44      | PE                   | Biolegend |
| IL-7R $\alpha$ (CD127)   | A019D5   | APC                  | Biolegend |
| CCR5 (CD195)             | J418F1   | PE-Dazzle 594        | Biolegend |
| CXCR3 (CD183)            | G025H7   | Brilliant Violet 711 | Biolegend |
| CD103                    | Ber-ACT8 | Brilliant Violet 421 | Biolegend |
| CD69                     | FN50     | FITC                 | Biolegend |

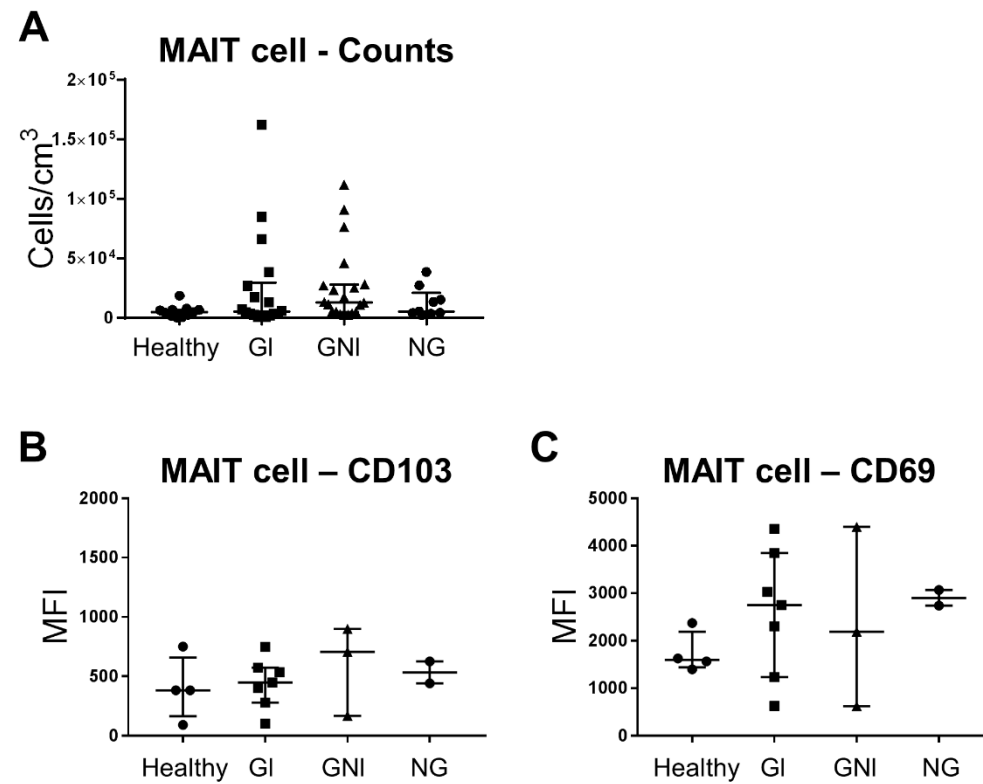

**Supplementary Figure 1. MAIT cell numbers and phenotype do not significantly correlate with primary diagnoses of patients.** Absolute numbers of MAIT cells (**A**), and MAIT cell expression of CD103 (**B**) and CD69 (**C**) in healthy kidney tissue and diseased biopsies with glomerular immune-mediated (GI), glomerular non-immune-mediated (GNI) and non-glomerular (NG) primary diagnoses. Values for individual donors are presented; horizontal bars represent medians, with interquartile range also presented.
